# Supplementary material for: The role of CCR5+ monocytes in DHCA-induced lung injury
Source: Research Square preprint supplement (doi:10.21203/rs.3.rs-6147117/v1), 2025-04-16
Supplement: Supplementary file 1 [file 5e399b92ee887bf209af164c.docx]

**Supplemental Material**

**Figure legends**


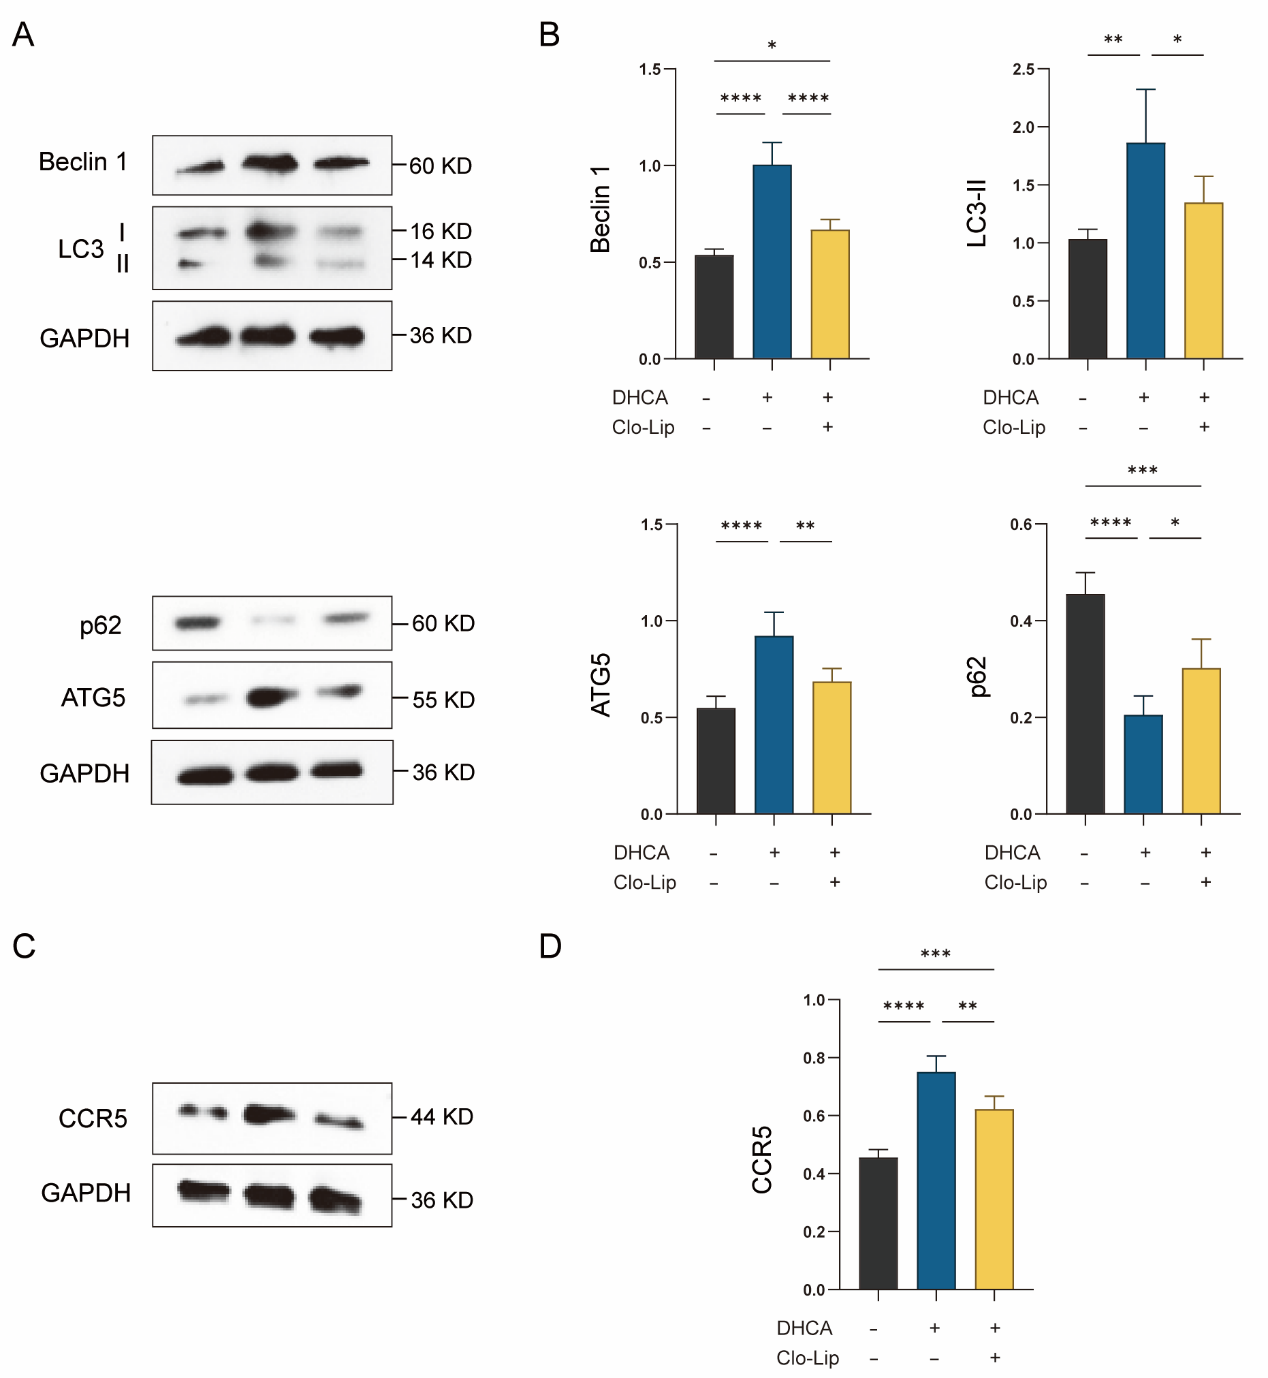


**Figure S1.**

**Changes in autophagy levels and CCR5 levels after application of clodronate-liposomes (Clo-Lip)**. **(A and B)** Compared with the Sham group, the expression levels of autophagy-related proteins, including LC3-II, Beclin 1, and ATG5 were clearly increased in DHCA group, indicating that autophagy was activated after DHCA. In contrast, after the administration of Clo-Lip, rats showed a recovery of autophagy-related protein expression, which was eventually even approached the autophagy level in the Sham group. **(C and D)** Compared with the Sham group, the expression level of CCR5 was clearly increased in DHCA group. Notably, after the administration of maraviroc (MVC), the expression level of CCR5 was suppressed after DHCA.


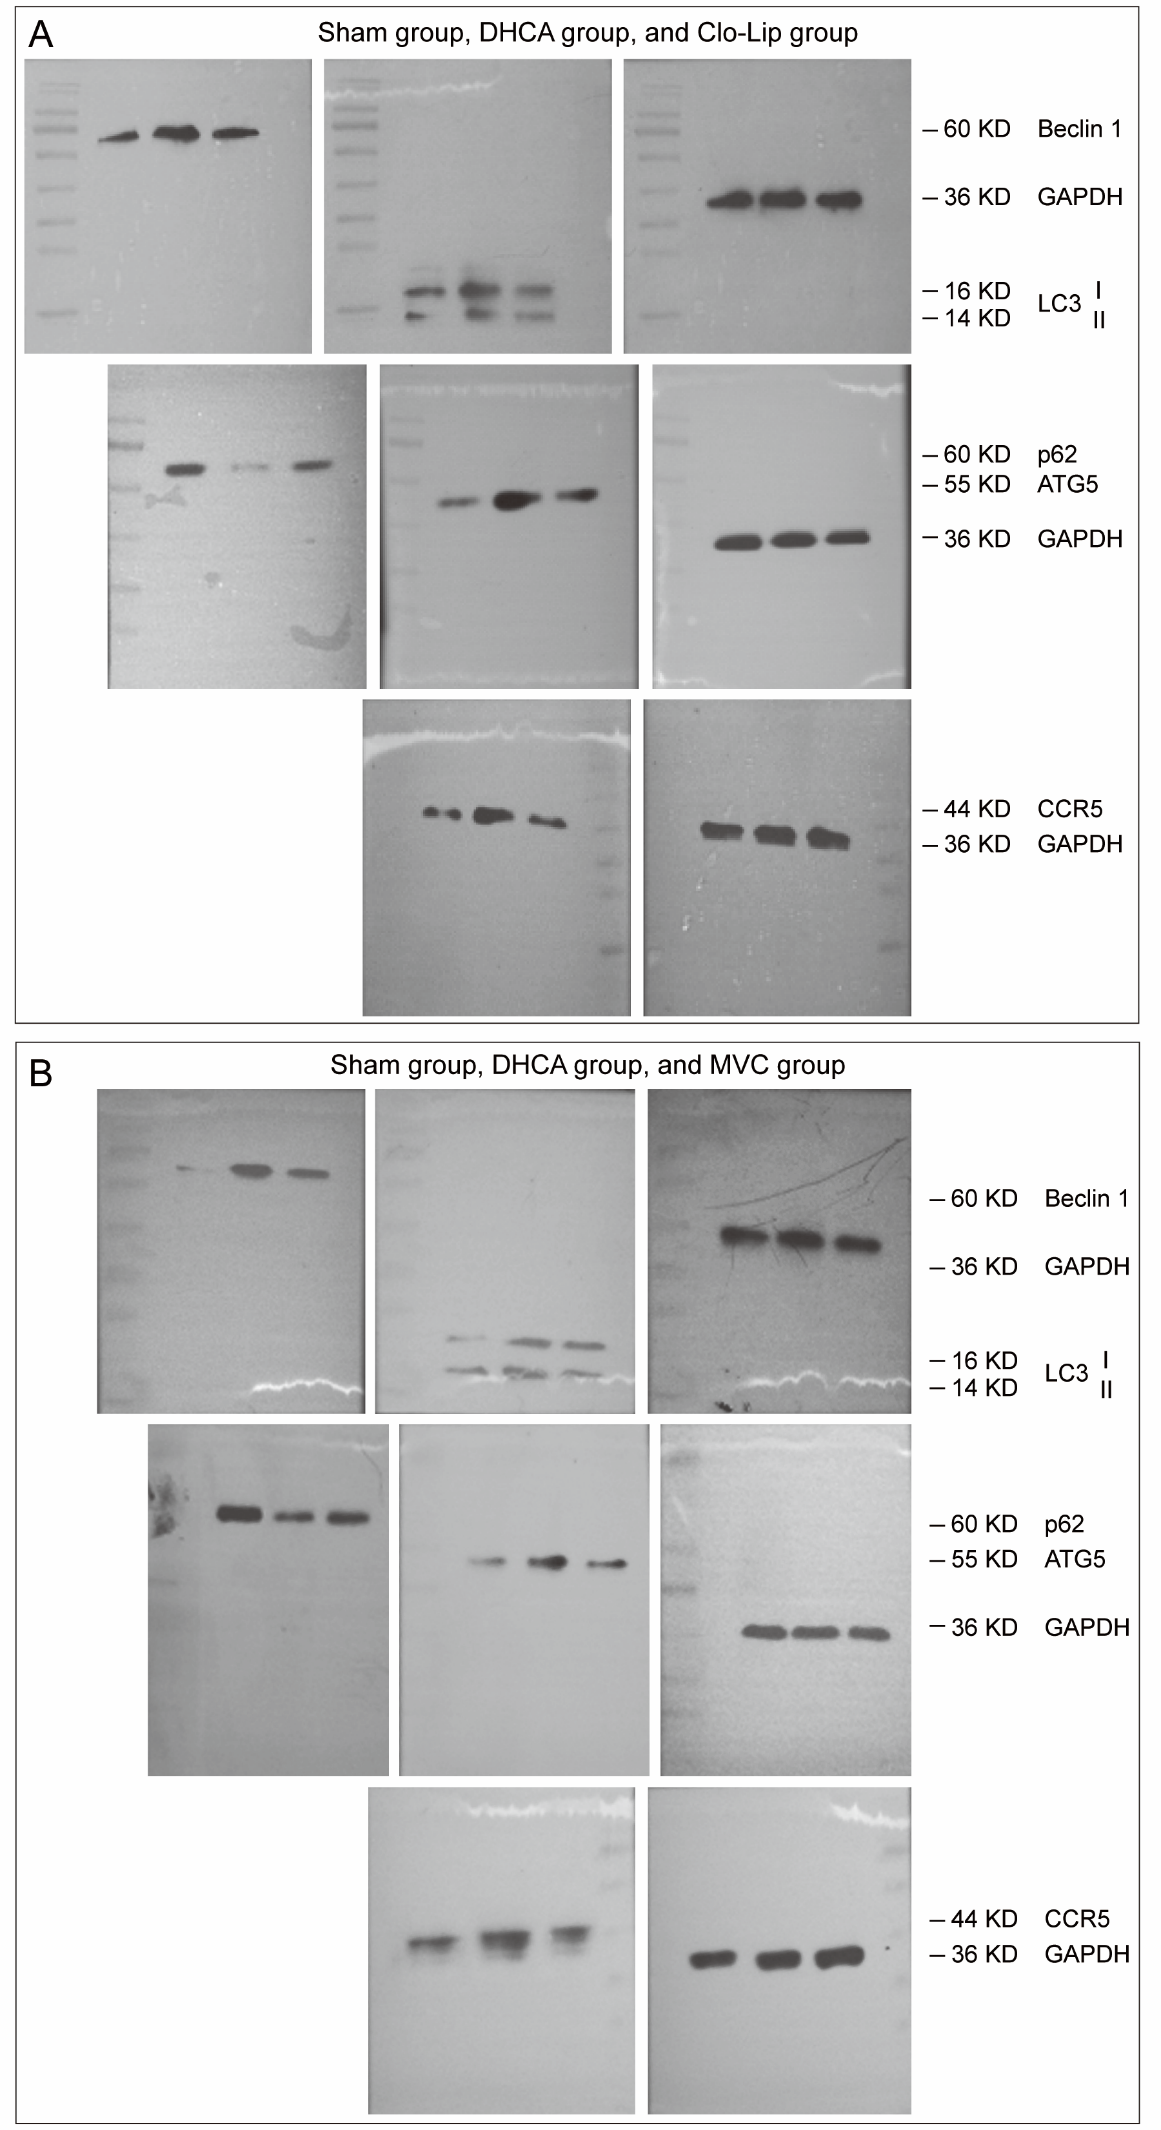


**Figure S2.**

**Full-length gels and blots. (A)** CCR5 anda set of autophagy machinery proteins including LC3-II, Beclin 1, ATG5, and p62 have been measured using lung tissue obtained from different designated group rats (Sham group, DHCA 6h group, and Clo-Lip group) to assess CCR5 expression and autophagy activity. **(B)** CCR5 and a set of autophagy machinery proteins including LC3-II, Beclin 1, ATG5, and p62 have been measured using lung tissue obtained from different designated group rats (Sham group, DHCA 6h group, and MVC group) to assess CCR5 expression and autophagy activity.
